# Supplementary material for: Muscarinic receptor M3 contributes to intestinal stem cell maintenance via EphB/ephrin-B signaling
Source: Life Sci Alliance. 2021 Jul 9;4(9):e202000962. doi: 10.26508/lsa.202000962 (PMC8321669; doi:10.26508/lsa.202000962)
Supplement: Supplementary file 3 [file LSA-2020-00962_SdataF2.xlsx]

## Sheet: Sheet1
Fig 2B	Number of Ki67+ cells/crypt															Duodenum						Jejunum						Ileum
	Duodenum	Jejunum	Ileum	STDEV	STDEV	STDEV										WT	Ki67+ cell		M3KO	Ki67+ cell		WT	Ki67+ cell		M3KO	Ki67+ cell		WT	Ki67+ cell		M3KO	Ki67+ cell
WT	16.16	14.81	14.63	2.48	3.11	2.11										4 crypts	12		2 crypts	25		2 crypts	12		4 crypts	23		5 crypts	15		3 crypts	25
M3-/-	24.48	25.6	28.73	4.27	2.8	4.85											15			25			14			30			14			20
																	18		3 crypts	28		4 crypts	14			26			10			31
																	14			32			14			26			16		5 crypts	32
Duodenum		t-test	5.11523e-11	p<0.0005	***											6 crypts	13			21			15		3 crypts	27			16			34
Jejunum		t-test	2.76653e-14	p<0.0005	***												21		6 crypts	20			14			23		4 crypts	13			25
Ileum		t-test	4.04605e-15	p<0.0005	***												13			20		5 crypts	16			29			14			22
																	20			20			14		3 crypts	27			14			18
																	16			22			17			21			14		4 crypts	31
																	15			24			16			24		4 crypts	14			26
																3 crypts	16			20			17		4 crypts	21			16			34
																	14		5 crypts	24		4 crypts	13			27			14			27
																	18			24			10			26			13		4 crypts	36
																3 crypts	14			20			18			22		3 crypts	16			29
																	18			18			9		6 crypts	25			18			30
																	19			18		6 crypts	14			25			18			34
																5 crypts	16		4 crypts	30			23			31		3 crypts	18		6 crypts	35
																	18			31			18			27			12			29
																	15			26			13			28			13			23
																	18			25			12			24		19 crypts	14.6316			32
																	18		5 crypts	28			18		20 crypts	25.6			2.11373			27
																4 crypts	20			31		21 crypts	14.8095			2.7985						28
																	15			28			3.10836								4 crypts	36
																	14			23												28
																	14			29												30
																25 crypts	16.16		25 crypts	24.48												25
																	2.4779			4.27317											26 crypts	28.7308
Fig 2D	Number of BrdU+ cells/crypt			Duodenum																												4.85434
WT	BrdU+ (3h)		M3KO	BrdU+ (3h)		WT	BrdU+ (6h)		M3KO	BrdU+ (6h)		WT	BrdU+ (15h)		M3KO	BrdU+ (15h)		WT	BrdU+ (24h)		M3KO	BrdU+ (24h)
6 crypts	9		3 crypts	11		7 crypts	10		3 crypts	17		2 crypts	19		5 crypts	14		5 crypts	18		4 crypts	30
	11			12			7			15			19			19			16			26
	8			15			9			24		4 crypts	15			23			16			18
	5		4 crypts	12			11		5 crypts	17			17			16			16			19
	10			9			9			16			17			19			22		4 crypts	22
	6			12			11			17			14		6 crypts	34		4 crypts	17			19
6 crypts	7			14			10			16		5 crypts	17			26			19			35
	9		4 crypts	14		7 crypts	6			17			14			25			16			33
	5			15			10		4 crypts	24			12			15			14		4 crypts	22
	10			9			8			16			14			15		5 crypts	22			33
	11			10			8			22			16			26			13			36
	8		5 crypts	16			10			29		8 crypts	15		2 crypts	26			16			20
8 crypts	12			12			7		4 crypts	22			13			30			13		5 crypts	22
	4			12			7			27			12		2 crypts	20			18			18
	5			11		6 crypts	10			17			16			21		5 crypts	22			20
	7			10			8			18			12		4 crypts	21			17			17
	9		4 crypts	13			11		5 crypts	17			14			17			17			21
	6			13			10			19			13			14			26		4 crypts	23
	6			12			10			14			12			27			16			19
	7			19			10			18		5 crypts	12		5 crypts	19		5 crypts	14			18			3 h	6 h	15 h	24 h	STDEV	STDEV	STDEV	STDEV
4 crypts	8		2 crypts	12		6 crypts	10			20			17			14			18			25		WT	7.8	10.19	14.19	17.7	2.17	2.19	2.25	3.22
	11			12			12		5 crypts	20			15			22			14		4 crypts	25		M3-/-	11.84	19.38	20.03	24.3	2.37	3.31	4.86	5.59
	8		5 crypts	12			9			16			16			17			16			28
	7			13			17			22			15			17			15			22		t-test	Duodenum
5 crypts	10			12			8			21		5 crypts	16		5 crypts	14		5 crypts	15			30		3h	4.39427e-13	p<0.0005
	7			14			9			18			10			15			18		3 crypts	20		6h	3.96276e-32	p<0.0005
	8			12		7 crypts	10		4 crypts	16			13			20			16			23		15h	7.55836e-09	p<0.0005
	7		3 crypts	12			15			16			14			22			16			23		24h	3.87653e-09	p<0.0005
	6			14			11			26			13			17			15		3 crypts	22
5 crypts	10			11			11			19		3 crypts	11		5 crypts	21		4 crypts	18			39
	13		5 crypts	14			8		5 crypts	23			13			18			19			27
	4			9			9			17			17			18			14		3 crypts	22
	7			7			9			19		5 crypts	14			20			18			30
	6			7		5 crypts	11			18			13			19		3 crypts	20			22
7 crypts	7			11			13			16			12		34 crypts	20.0294			18		3 crypts	20
	7		5 crypts	12			13		3 crypts	19			12			4.86475			22			25
	11			13			15			20			11		Total	681		4 crypts	27			25
	6			12			12			21		37 crypts	14.1892						15		37 crypts	24.2973
	4			10		5 crypts	11		5 crypts	17			2.24645						18			5.59198
	9			8			9			18		Total	525						17		Total	899
	8		5 crypts	8			10			17								4 crypts	23
5 crypts	7			15			10			18									22
	9			10			13			21									17
	10			10		6 crypts	13		3 crypts	20									20
	7			12			11			22								44 crypts	17.7045
	7		45 crypts	11.8444			14			22									3.22476
46 crypts	7.80435			2.37368			10		5 crypts	21								Total	779
	2.16661		Total	533			8			23
Total	359						8			16
						4 crypts	9			19
							12			23
							9		5 crypts	20
							9			14
						53 crypts	10.1887			24
							2.19314			24
						Total	540			17
									56 crypts	19.375
										3.31148
									Total	1085
Fig 2D	Number of BrdU+ cells/crypt			Jejunum
WT	BrdU+ (3h)		M3KO	BrdU+ (3h)		WT	BrdU+ (6h)		M3KO	BrdU+ (6h)		WT	BrdU+ (15h)		M3KO	BrdU+ (15h)		WT	BrdU+ (24h)		M3KO	BrdU+ (24h)
6 crypts	6		5 crypts	14		6 crypts	13		5 crypts	14		3crypts	17		6 crypts	22		3 crypts	24		3 crypts	30
	9			12			10			19			15			17			17			24
	14			12			13			18			16			24			16			22
	7			8			8			18		5 crypts	18			23		4 crypts	20		3 crypts	35
	8			9			12			15			18			22			16			23
	12		4 crypts	12			12		4 crypts	16			17			24			18			28
6 crypts	7			11		5 crypts	11			20			15		4 crypts	22			17		3 crypts	29
	7			10			10			16			15			20		3 crypts	16			38
	9			11			8			17		5 crypts	14			19			15			27
	8		5 crypts	11			11		4 crypts	18			16			18			18		2 crypts	26
	12			12			9			15			18		3 crypts	19		3 crypts	25			39
	5			12		6 crypts	12			22			15			15			19		3 crypts	28
4 crypts	10			13			15			13			19			17			20			29
	12			12			13		2 crypts	17		4 crypts	17		5 crypts	20		1 crypt	21			24
	8		4 crypts	12			10			20			13			20		1 crypt	15		2 crypts	19
	7			12			14		3 crypts	19			14			17		1 crypt	19			30
6 crypts	8			11			13			15			14			18		1 crypt	20		3 crypts	29
	8			19		6 crypts	16			18		5 crypts	13			15		1 crypt	17			30			3 h	6 h	15 h	24 h
	8		4 crypts	8			13		4 crypts	15			19		4 crypts	15		1 crypt	18			24		WT	8.64	11.64	15.37	18.56	2.17	1.86	2.21	2.98
	9			12			9			16			18			18		3 crypts	16		1 crypt	33		M3-/-	12.28	17.32	18.99	29.31	2.2	2.2	2.89	5.05
	10			15			9			16			15			14			16		2 crypts	22
	7			14			9			18			11			21			15			32		t-test	Jejunum
5 crypts	13		4 crypts	15			16		2 crypts	16		3 crypts	12		4 crypts	16		1 crypt	15		3 crypts	31		3h	6.27122e-21	p<0.0005	***
	8			8		6 crypts	12			21			13			17		2 crypts	21			22		6h	1.96755e-32	p<0.0005	***
	8			9			15		3 crypts	18			14			21			20			28		15h	2.97269e-15	p<0.0005	***
	12			10			13			13		4 crypts	15			21		3 crypts	19		3 crypts	33		24h	6.16317e-20	p<0.0005	***
	10		4 crypts	12			10			18			13		6 crypts	15			20			21
6 crypts	8			10			14		3 crypts	22			15			15			24			26
	9			12			13			18			14			19		2 crypts	19		3 crypts	30
	5			11		6 crypts	13			15		5 crypts	17			17			19			33
	10		2 crypts	11			12		5 crypts	14			13			20		2 crypts	25			25
	11			10			12			16			16			15			17		2 crypts	32
	7		5 crypts	11			12			14			16		2 crypts	16		2 crypts	19			29
8 crypts	8			14			13			17			16			19			25		2 crypts	32
	9			13			10			18		2 crypts	18		4 crypts	21		1 crypt	19			29
	11			12		3 crypts	13		1 crypt	20			14			16		4 crypts	14		2 crypts	23
	13			14			12		2 crypts	18		4 crypts	15			30			17			31
	10		5 crypts	14			12			22			16			19			18		2 crypts	30
	13			15		5 crypts	10		2 crypts	22			14		3 crypts	19			15			26
	10			12			14			20			13			22		39 crypts	18.5641		2 crypts	45
	8			10			11		4 crypts	16		3 crypts	14			19			2.98059			33
6 crypts	9			10			11			19			21		3 crypts	21		Total	724		1 crypt	34
	12		2 crypts	11			14			19			16			20					1 crypt	30
	11			10		6 crypts	13			18		2 crypts	14			22					1 crypt	34
	14		3 crypts	9			8		2 crypts	16			18		2 crypts	17					2 crypts	25
	5			12			13			15		6 crypts	17			15						35
	11			13			10		5 crypts	18			13		2 crypts	21					2 crypts	28
5 crypts	9		4 crypts	13			11			19			14			19						25
	7			15			12			18			16		2 crypts	15					1 crypt	36
	6			14		2 crypts	12			18			12			18					1 crypt	29
	8			10			10			15			14		3 crypts	19					2 crypts	35
	7		6 crypts	11		2 crypts	10		4 crypts	18		3 crypts	16			19						33
4 crypts	7			13			11			17			17			18					52 crypts	29.3077
	7			13		3 crypts	11			16			16		2 crypts	24						5.05087
	8			9			11			18		2 crypts	17			20					Total	1524
	10			15			13		4 crypts	16			17		4 crypts	18
7 crypts	13			14		4 crypts	10			17		3 crypts	12			17
	6		5 crypts	11			7			16			13			20
	9			13			13			16			14			20
	10			17			14		59 crypts	17.322		3 crypts	14		5 crypts	20
	8			12		2 crypts	13			2.20063			16			18
	9			16			11		Total	1022			13			18
	9		3 crypts	17		4 crypts	11					6 crypts	23			24
5 crypts	10			16			10						18			22
	8			13			10						20		4 crypts	18
	8		4 crypts	15			12						16			15
	9			14			11						15			17
	6			10			11						14			19
5 crypts	5			13			12					3 crypts	17		68 crypts	18.9853
	7		4 crypts	14			11						17			2.8936
	10			12			13						12		Total	1291
	7			13			12					4 crypts	13
	6			13		66 crypts	11.6389						19
6 crypts	8		3 crypts	13			1.8637						14
	6			13		Total	838						12
	8			12								4 crypts	13
	7		3 crypts	15									13
	8			9									15
	7			12									16
5 crypts	5		79 crypts	12.2785								4 crypts	15
	10			2.1952									15
	9		Total	970									16
	10												18
	6											3 crypts	14
5 crypts	7												16
	10												16
	6											86 crypts	15.3721
	7												2.20719
	10											Total	1322
89 crypts	8.64045
	2.16505
Total	769
Fig 2D	Number of BrdU+ cells/crypt			Ileum
WT	BrdU+ (3h)		M3KO	BrdU+ (3h)		WT	BrdU+ (6h)		M3KO	BrdU+ (6h)		WT	BrdU+ (15h)		M3KO	BrdU+ (15h)		WT	BrdU+ (24h)		M3KO	BrdU+ (24h)
5crypts	8		5 crypts	12		5 crypts	13		5 crypts	25		2 crypts	15		2 crypts	28		3 crypts	18		1 crypt	22
	9			15			8			20			19			23			21		3 crypts	21
	5			18			10			22		4 crypts	16		2 crypts	29			23			21
	7			14			9			22			16			19		2 crypts	19			19
	8			18			8			25			13		2 crypts	18			23		2 crypts	26
7 crypts	6		5 crypts	9		6 crypts	8		3 crypts	28			11			21		2 crypts	15			24
	5			13			12			18		3 crypts	14		5 crypts	23			22		2 crypts	24
	6			17			8			23			13			24		2 crypts	22			28
	7			14			11		2 crypts	18			14			25			21		2 crypts	31
	3			12			11			19		5 crypts	15			18		3 crypts	23			23
	10		5 crypts	15			13		2 crypts	17			14			19			15		2 crypts	27
	7			12		3 crypts	12			17			11		2 crypts	21			21			25
5 crypts	7			12			9		2 crypts	14			20			25		4 crypts	21		3 crypts	30
	6			16			10			15			16		4 cycles	27			18			36
	5			14		2 crypts	16		4 crypts	16		4 crypts	15			17			21			33
	8		4 crypts	11			11			20			12			20			17		2 crypts	27
	8			8		5 crypts	12			15			14			21		2 crypts	19			32
5 crypts	8			10			8			14			13		4 cycles	17			21		3 crypts	34			3 h	6 h	15 h	24 h
	8			15			14		5 crypts	17		6 crypts	12			18		3 crypts	16			41		WT	7.21	10.7	15	20.23	1.79	2.47	2.34	3.03
	11		4 crypts	10			16			21			13			19			17			43		M3-/-	13.39	20.1	20.66	29.07	2.55	4.26	3.49	5.85
	5			9			11			16			13			23			17		3 crypts	30
	10			10		5 crypts	7			19			11		3 crypts	19		4 crypts	16			26		t-test
5 crypts	5			16			10			16			14			19			16			32		3h	1.95941e-36	p<0.0005	***
	6		2 crypts	11			9		5 crypts	18			14			17			19		3 crypts	36		6h	6.08678e-27	p<0.0005	***
	6			11			10			18		5 crypts	11		2 crypts	21			19			27		15h	5.26623e-19	p<0.0005	***
	6		3 crypts	13			16			18			15			16		3 crypts	19			32		24h	9.82292e-11	p<0.0005	***
	5			9		4 crypts	8			21			17		2 crypts	18			24		2 crypts	27
5 crypts	7			11			10			16			13			22			21			32
	8		4 crypts	10			8		4 crypts	17			14		3 crypts	21		3 crypts	28			34
	7			16			12			21		5 crypts	14			15			22		28 crypts	29.069
	6			16		3 crypts	8			20			11			17			23			5.85498
	7			12			11		4 crypts	25			15		2 crypts	21		4 crypts	24		Total	843
8 crypts	7		5 crypts	13			12			25			18			19			23
	6			12		7 crypts	10			29			15		2 crypts	28			24
	9			12			7			30		3 crypts	13			23			20
	5			15			9		2 crypts	26			18		2 crypts	24		35 crypts	20.2286
	8			13			10			23			18			18			3.0301
	9		3 crypts	14			11		38 crypts	20.1081		4 crypts	16		3 crypts	19		Total	708
	7			12			7			4.26083			18			20
	6			17			9		Total	744			16			21
5 crypts	9		3 crypts	13		7 crypts	13						19		4 cycles	19
	10			18			8					4 crypts	20			15
	6			18			16						15			20
	9		1 crypt	14			11						14			19
	7		2 crypts	14			7						16		3 crypts	21
5 crypts	7			15			11					3 crypts	15			25
	6		3 crypts	11			8						15			18
	10			14		7 crypts	15						17		2 crypts	30
	10			12			7					3 crypts	15			22
	11		6 crypts	16			12						15		2 crypts	25
6 crypts	6			12			11						16			20
	5			16			9					4 crypts	15		3 crypts	21
	6			15			11						20			19
	5			10			10						15			17
	7			12		3 crypts	17						17		4 cycles	21
	8		2 crypts	16			9					3 crypts	13			15
6 crypts	6			16			11						15			20
	7		5 crypts	16		7 crypts	11						15			18
	6			15			13					5 crypts	15		58 crypts	20.6552
	8			11			13						14			3.48708
	8			13			11						12		Total	1198
	6			13			11						20
6 crypts	7			12			12						17
	7		5 crypts	12			12					63 crypts	15
	9			15		7 crypts	12						2.34177
	10			15			11					Total	945
	7			18			11
	5			13			9
7 crypts	5		4 crypts	10			16
	12			18			8
	7			11			10
	6			13		71 crypts	10.7042
	8		71 crypts	13.3889			2.47499
	7			2.55396		Total	760
	11		Total	964
75 crypts	7.21333
	1.78805
Total	541
