# Supplementary material for: Muscarinic receptor M3 contributes to intestinal stem cell maintenance via EphB/ephrin-B signaling
Source: Life Sci Alliance. 2021 Jul 9;4(9):e202000962. doi: 10.26508/lsa.202000962 (PMC8321669; doi:10.26508/lsa.202000962)
Supplement: Supplementary file 6 [file LSA-2020-00962_SdataFS3.xlsx]

## Sheet: Sheet1
mmu04668:TNF signaling pathway				WT	M3-/-			p value
NM_011610	TNFR2(NM_011610:Tnfrsf1b)			1	3.51601	0.226663	0.139581	0.000672779
NM_008580	ASK1(NM_008580:Map3k5)			1	1.39343	0.032539	0.080328	0.00554346
NM_138667	TAB1/2/3 (NM_138667:Tab2)			1	1.24356	0.040554	0.03789	0.0041913
NM_009316	Tak1 (NM_009316:Map3k7)			1	1.35683	0.094656	0.065305	0.0194539
NM_016896	Nik (NM_016896:Map3k14)			1	1.52583	0.072098	0.086755	0.00276453
NM_007746	Tpl2 (NM_007746:Map3k8)			1	2.83679	0.626243	0.263664	0.0410097
NM_009157	MKK4/7(NM_009157:Map2k4)			1	1.34786	0.064065	0.030272	0.00878045
NM_011943	MKK3/6 (NM_011943:Map2k6)			1	1.35429	0.098676	0.108111	0.0303502
NM_207692	JNK1/2(NM_207692:Mapk9)			1	1.60459	0.177282	0.10271	0.0264539
NM_011950	p38 (NM_011950:Mapk13)			1	1.2856	0.022187	0.077747	0.0152304
NM_001038663	ERK1/2(NM_001038663:Mapk1)			1	1.38122	0.104844	0.089436	0.0226612
NM_007611	Casp7 (NM_007611)			1	1.38258	0.037557	0.052892	0.00105702
NM_145857	Nod2(NM_145857)			1	4.30026	0.500292	0.980283	0.0180976
