# Supplementary material for: Muscarinic receptor M3 contributes to intestinal stem cell maintenance via EphB/ephrin-B signaling
Source: Life Sci Alliance. 2021 Jul 9;4(9):e202000962. doi: 10.26508/lsa.202000962 (PMC8321669; doi:10.26508/lsa.202000962)
Supplement: Supplementary file 7 [file LSA-2020-00962_SdataFS4.xlsx]

## Sheet: Sheet1
mmu04010:MAPK signaling pathway				WT	M3-/-			p value
NM_001044741	CACN (NM_001044741:Cacnb3)			1	2.41089	0.221698	0.261173	0.00460838
NM_138667	Tab2 (NM_138667)			1	1.24356	0.040554	0.03789	0.0041913
NM_011035	Pak1 (NM_011035)			1	1.19862	0.054335	0.022699	0.0252699
NM_008279	MEKK1 (NM_008279:Map3k1)			1	4.19611	0.505105	0.931581	0.0171579
NM_011947	MEKK2/3 (NM_011947:Map3k3)			1	1.2726	0.082283	0.076288	0.0316897
NM_008580	ASK1(NM_008580:Map3k5)			1	1.39343	0.032539	0.080328	0.00554346
NM_016896	NIK (Map3K14:NM_016896)			1	1.52583	0.072098	0.086755	0.00276453
NM_009316	Tak1 (NM_009316:Map3k7)			1	1.35683	0.094656	0.065305	0.0194539
NM_178220	Arrb1 (NM_178220)			1	1.4377	0.009413	0.103893	0.011959
NM_009157	MKK4 (NM_009157:Map2k4)			1	1.34786	0.064065	0.030272	0.00878045
NM_011943	MKK6 (NM_011943:Map2k6)			1	1.35429	0.098676	0.108111	0.0303502
NM_013931	Jip3 (NM_013931:Mapk8ip3)			1	78.4733	0.999943	22.4246	0.0197487
NM_001038663	ERK (NM_001038663:Mapk1)			1	1.38122	0.104844	0.089436	0.0226612
NM_207692	JNK (NM_207692:Mapk9)			1	1.60459	0.177282	0.10271	0.0264539
NM_011950	p38 (NM_011950:Mapk13)			1	1.2856	0.022187	0.077747	0.0152304
